# Supplementary material for: Tuning the nitrogen-doping configuration in carbon materialsviasulfur doping for ultrastable potassium ion storage
Source: Royal Society of Chemistry journal article supplement (doi:10.1039/d1ta03811g), 2021-01-01
Supplement: d1ta03811g1.pdf [file d1ta03811g1.pdf]

# **Tuning the nitrogen-doping configuration in carbon materials via sulfur doping for ultrastable potassium ion storage**

Yang Xu,<sup>aΔ</sup> Changlai Wang,<sup>b,cΔ</sup> Ping Niu,<sup>a</sup> Zhiqiang Li,<sup>a</sup> Lingzhi Wei,<sup>a</sup> Ge Yao,<sup>a</sup>  
Fangcai Zheng\*<sup>a</sup> and Qianwang Chen\*\*<sup>a,b</sup>

<sup>a</sup> Institutes of Physical Science and Information Technology, Key Laboratory of Structure and Functional Regulation of Hybrid Materials, Anhui University, Ministry of Education, Hefei, 230601, People's Republic of China

<sup>b</sup> Hefei National Laboratory for Physical Science at Microscale and Department of Materials Science & Engineering, University of Science and Technology of China, Hefei 230026, People's Republic of China

<sup>c</sup> Center of Super-Diamond and Advanced Films (COSDAF), Department of Materials Science and Engineering, City University of Hong Kong, Tat Chee Avenue, Kowloon, Hong Kong, People's Republic of China

Corresponding authors: zfc@ustc.edu.cn (F.C. Zheng)

cqw@ustc.edu.cn (Q. W. Chen)

Y. Xu and Dr. C. Wang contribute equally to this work.

## Experiment

*Material Synthesis:* Nickel chloride ( $\text{NiCl}_2 \cdot 6\text{H}_2\text{O}$ ,  $\geq 98\%$ ), nitrilotriacetic acid (NTA,  $\geq 98.5\%$ ), isopropanol ( $\geq 99.7\%$ ), commercial active carbon (AC) and ultrapure water were used. All reagents are analytically pure without any further purification.

The Ni-NTA was synthesized by a simple solvothermal method. Firstly, 1.2 g of  $\text{NiCl}_2 \cdot 2\text{H}_2\text{O}$ , 0.9 g of nitrilotriacetic acid and 30 mL of isopropanol were mixed in 50 mL Teflon-lined stainless steel autoclave, and then 10 mL of water was added to the above solution after stirring for 20 min. The stainless steel autoclave was heated at  $180^\circ\text{C}$  for 6 h. The product was collected by centrifugation, washed with ethanol for three times, and dried at  $60^\circ\text{C}$  overnight. The as-prepared Ni-NTA was placed in a ceramic boat and annealed at different temperatures ( $500$ ,  $600$  and  $700^\circ\text{C}$ ) in  $\text{N}_2$  atmosphere with a heating rate of  $5^\circ\text{C min}^{-1}$  and kept for 2 h, respectively. Subsequently, the obtained black products were stirred in mixed acids (40 mL of  $\text{HCl}$  ( $6\text{ mol L}^{-1}$ ) and 40 mL of  $\text{HNO}_3$  ( $3\text{ mol L}^{-1}$ )) at  $80^\circ\text{C}$  to remove Ni. The corresponding samples were denoted as N-CMs-500, N-CMs-600, and N-CMs-700, respectively. For S/N-CMs, 500 mg of sulfur powder was placed upstream of N-CMs-600 (100 mg) along the  $\text{N}_2$  flow direction, which was annealed at  $600^\circ\text{C}$  for 2 hours with a heating rate of  $5^\circ\text{C min}^{-1}$ .

*Material Characterization:* The S/N-CMs were tested with X-ray powder diffraction (XRD) (Rigaku Co, Japan, D/MAX- $\gamma$ A). The surface of samples was observed by scanning electron microscopy (SEM, JEOL JSM-6700 M). Transmission electron microscopy (TEM, Hitachi H-800) and high-resolution transmission electron microscopy (HRTEM, JEOL-2011) were used to study the material structure and element distribution of S/N-CMs. The electronic states of related elements were

characterized by X-ray photoelectron spectroscopy (XPS). The degree of defect of porous carbon was characterized by Raman spectra (Via-Reflex/inVia-Reflex). A Shimadzu-50 thermoanalyser (TGA) was used to investigate the thermal behavior of the precursor under flowing N<sub>2</sub> with a heating rate of 20 °C min<sup>-1</sup>.

*Electrochemical Measurements:* The cell was assembled with CR2032 coin cells at a glovebox filled with Argon atmosphere (O<sub>2</sub> ≤ 0.01 ppm, H<sub>2</sub>O ≤ 0.01 ppm). To prepare the electrode, the active material was mixed with acetylene black and Polyvinylidene Fluoride (PVDF) at ratio 8:1:1 in N-methyl pyrrolidone (NMP) to form uniform slurry. The slurry was loaded on the Cu foil and then dried at 80 °C for 24 h in a vacuum drying oven. The metal potassium is employed as cathode electrode, and the electrolyte was a solution of 3 mol L<sup>-1</sup> KFSI in EC:DC = 1:1. The electrode loading mass is around 0.4 mg. For potassium ion capacitor, S/N-CMs-600 coated on Al foil was served as the anode and commercial activated carbon (Alladdin) was served as the cathode. The mass ratio for anode and cathode is 1:2. Cyclic voltammetry (CV) and electrochemical impedance spectroscopy (EIS) were performed on CHI760E electrochemical workstation. The galvanostatic charge/discharge measurements and Galvanostatic Intermittent Titration Technique were conducted on Neware CT3008W.

*Theoretical calculations:* All theoretical calculations were performed based on density functional theory (DFT), as implemented in the Vienna ab-initio simulation package (VASP).<sup>1</sup> The exchange-correlation interactions were treated by The Perdew-Becke-Ernzerhof (PBE) <sup>2</sup> functional. The projector augmented wave (PAW) <sup>3</sup> was used with a kinetic energy cutoff of 400 eV. All structures were optimized with a convergence criterion of 1 × 10<sup>-5</sup> eV for the energy and 0.01 eV/Å for the forces. The first Brillouin zone was sampled by a 3 × 3 × 3 k-point grid generated within the Monkhorst-Pack <sup>4</sup> scheme.

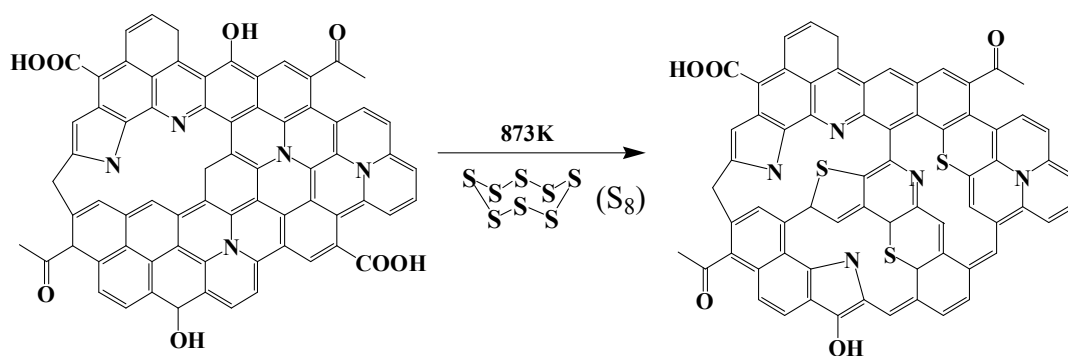

**Scheme S1.** The scheme for the formation of S/N-CMs-600.

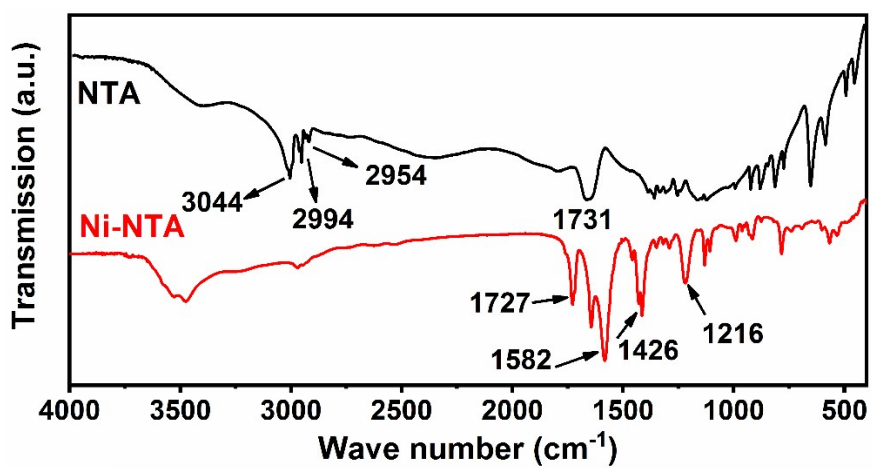

**Figure S1.** FTIR spectra of Ni-NTA and NTA.

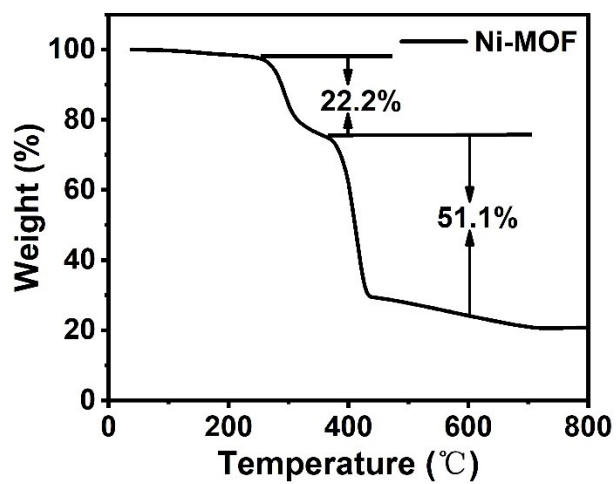

Figure S2. TG curves of Ni-NTA.

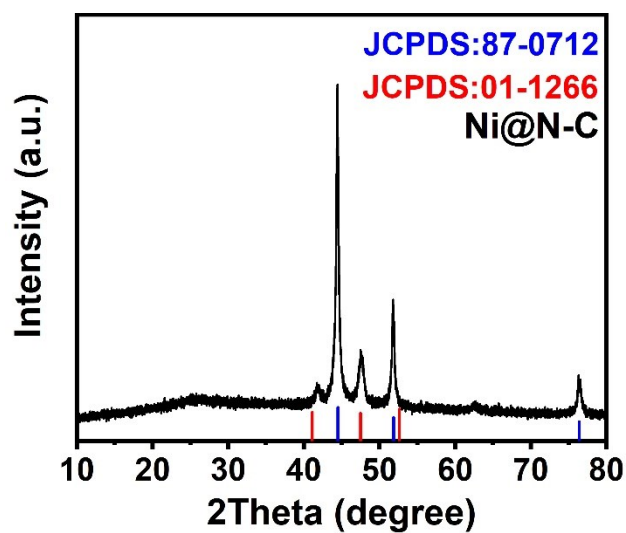

Figure S3. XRD pattern of Ni@N-C.

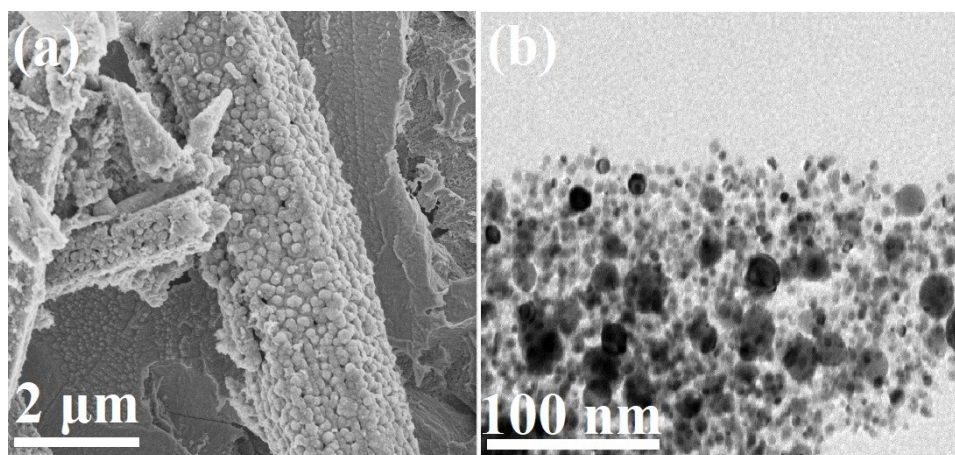

**Figure S4.** SEM and TEM images of Ni@N-C.

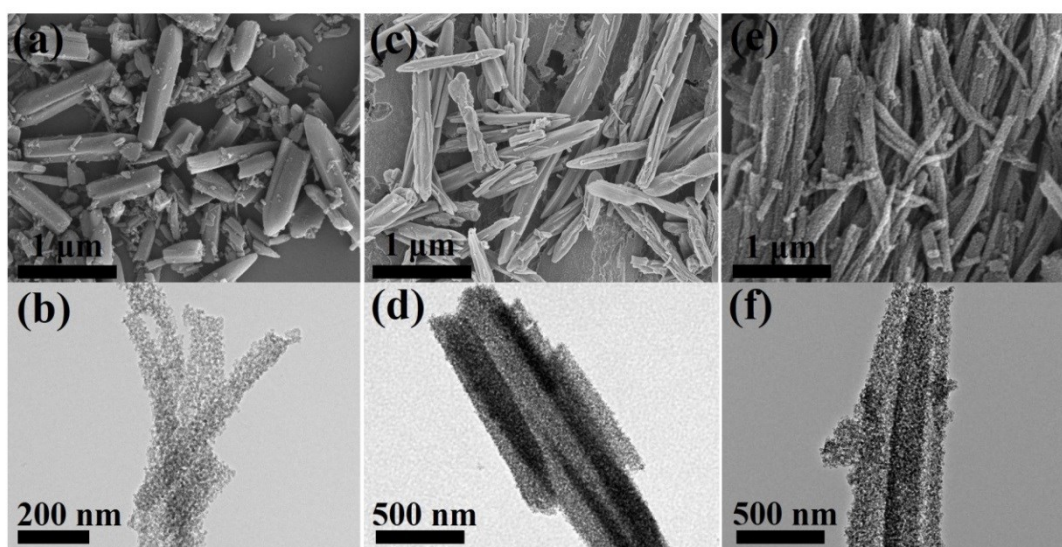

**Figure S5.** SEM and TEM images of (a,b) N-CMs-500, (c,d) N-CMs-600 and (e,f) N-CMs-700.

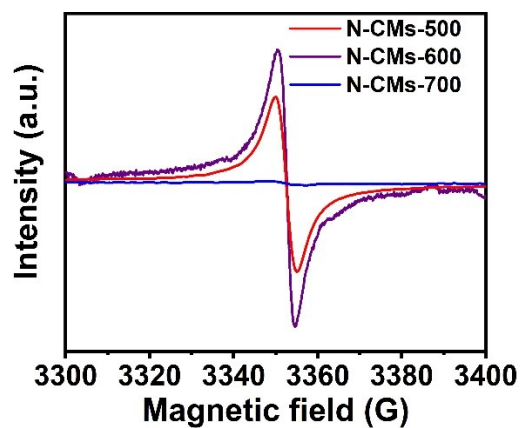

Figure S6. EPR spectra for N-CMs-500, N-CMs-600 and N-CMs-700.

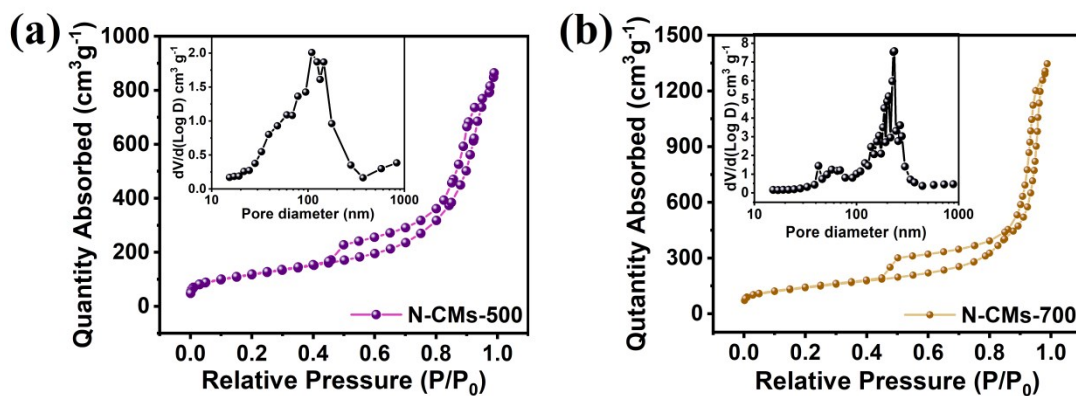

Figure S7.  $N_2$  adsorption-desorption isotherms and pore size distribution of (a) N-CMs-500 and (b) N-CMs-700.

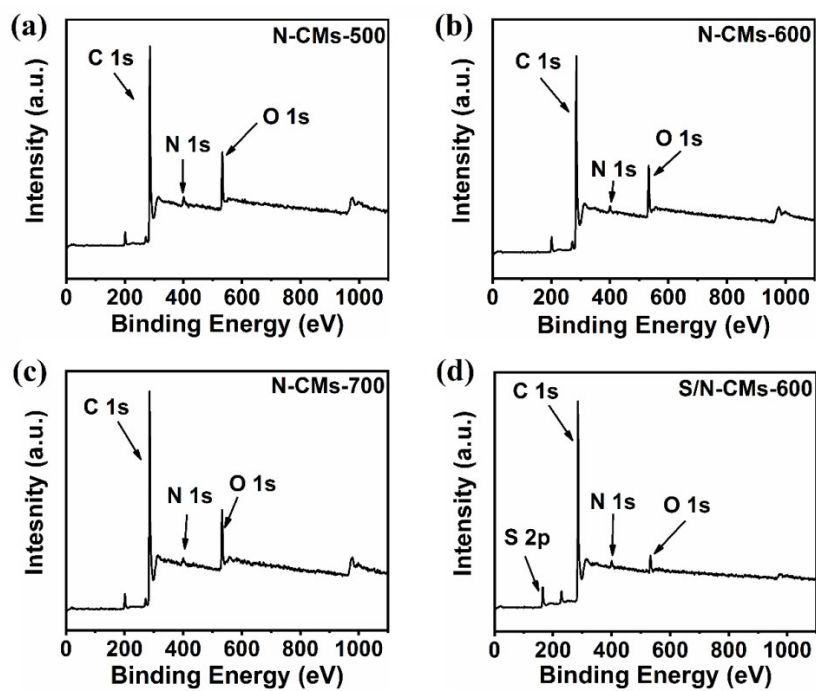

**Figure S8.** XPS survey of N-CMs-500, N-CMs-600, N-CMs-700 and S/N-CMs-600.

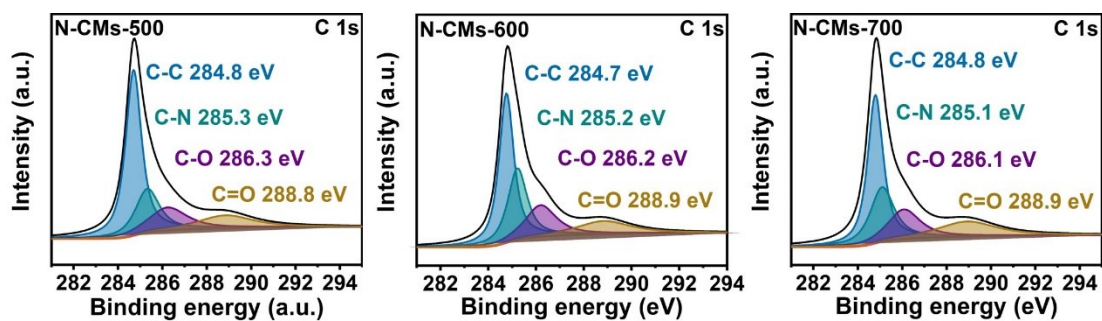

**Figure S9.** C 1s spectra for (a) N-CMs-500, (b) N-CMs-600 and (c) N-CMs-700.



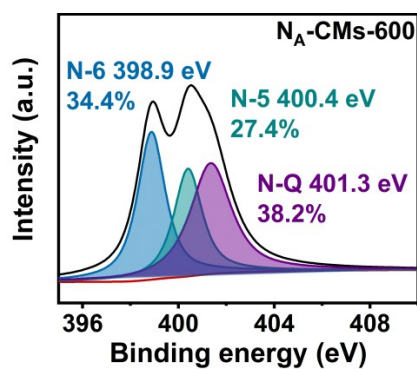

**Figure S10.** The N1s spectura of N<sub>A</sub>-CMs-600

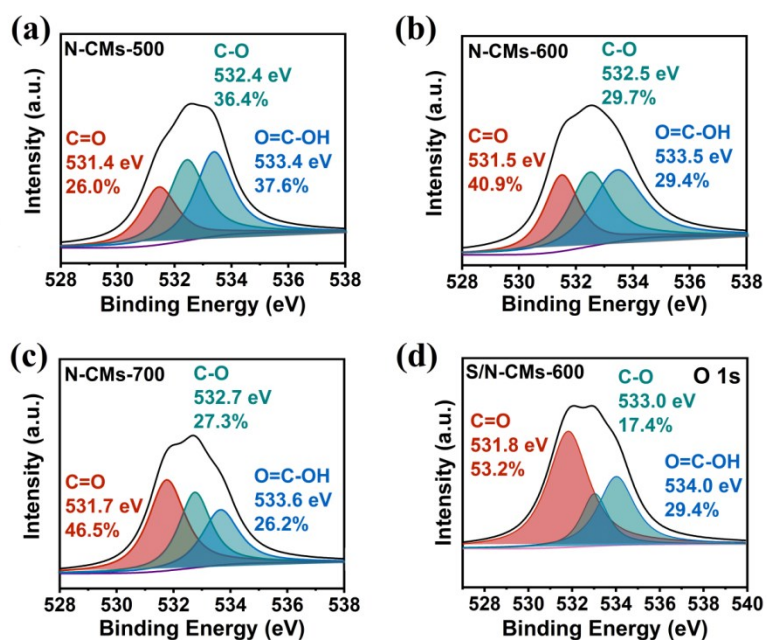

**Figure S11.** O 1s spectra for (a) N-CMs-500, (b) N-CMs-600, (c) N-CMs-700 and (d) S/N-CMs-600.

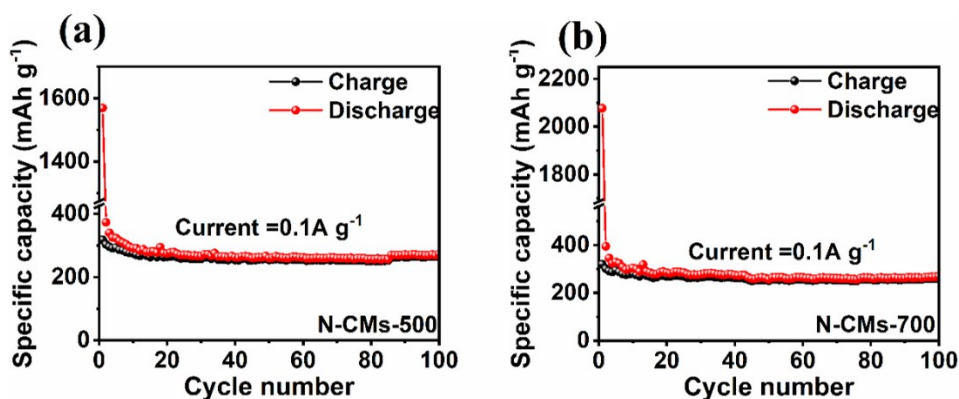

**Figure S12.** Cycling performances of (a) N-CMs-500 and (b) N-CMs-700 at 0.1 A g<sup>-1</sup>.

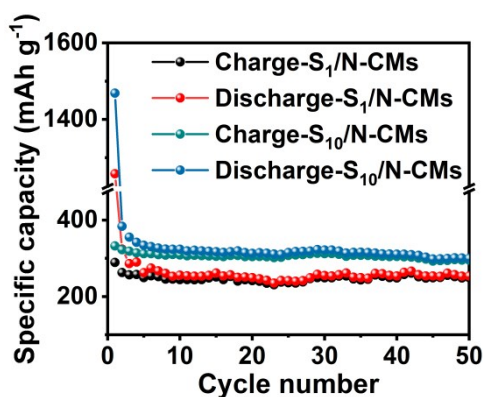

**Figure S13.** Cycling performances of S<sub>1</sub>/N-CMs and S<sub>10</sub>/N-CMs at 0.1 A g<sup>-1</sup>.

To further explore the effect of the sulfur content on the potassium storage performance, the different ratios (1:1 and 10:1) of the sulfur powder and N-CMs-600 were chosen to synthesize S/N-CMs, and the corresponding samples were denoted as S<sub>1</sub>/N-CMs and S<sub>10</sub>/N-CMs. As shown in Figure S12, the S<sub>10</sub>/N-CMs (298.5 mAh g<sup>-1</sup> at 0.1 A g<sup>-1</sup> over 50 cycles) displays a higher capacity than that S<sub>1</sub>/N-CMs (248.6 mAh g<sup>-1</sup> at 0.1 A g<sup>-1</sup> over 50 cycles), indicating that the increase of sulfur content contributes to the potassium storage performance. However, the potassium storage capacities of S<sub>1</sub>/N-CMs and S<sub>10</sub>/N-CMs are lower than that of N-CMs-600 (441.5 mAh g<sup>-1</sup> at 0.1 A g<sup>-1</sup> over 100 cycles) synthesized with 5:1 of the sulfur powder and N-CMs-600.

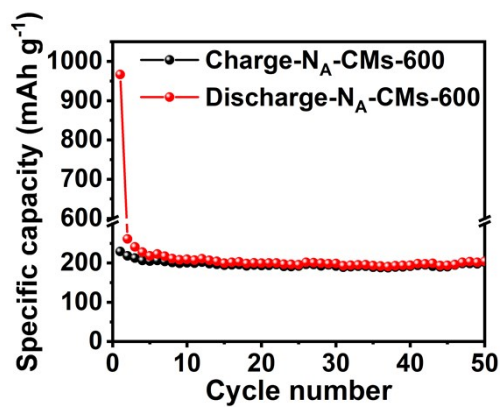

Figure S14. The cycle performances of  $N_A$ -CMs-600 at  $0.1 \text{ A g}^{-1}$ .

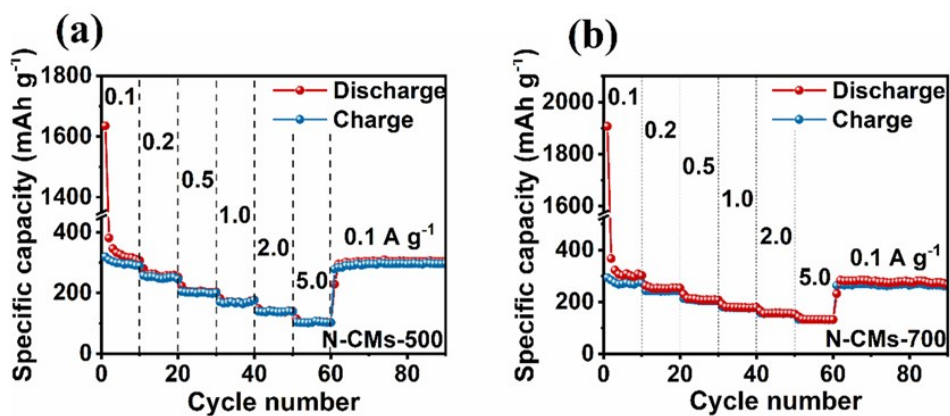

Figure S15. Rate performances of (a) N-CMs-500 and (b) N-CMs-700.

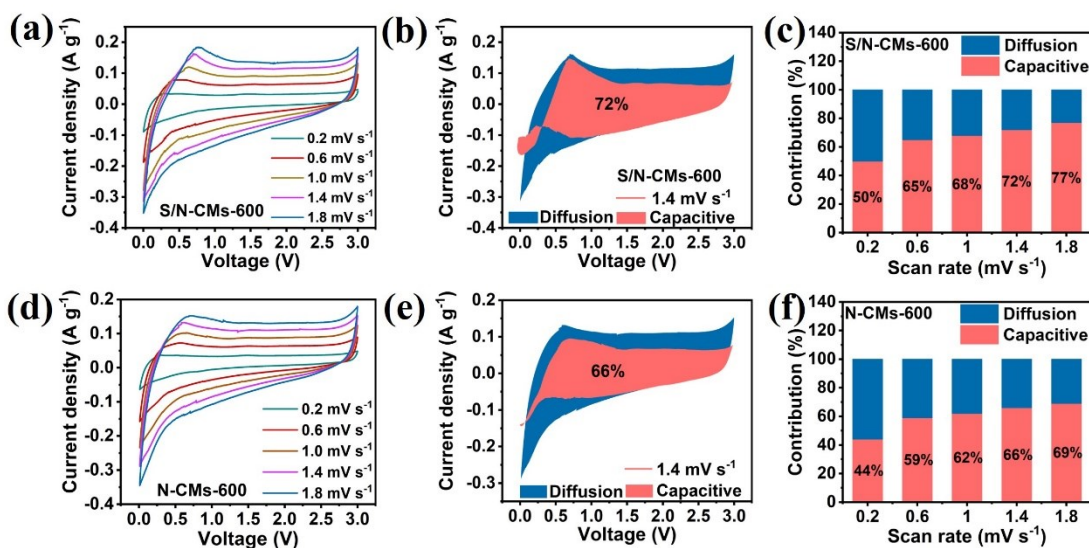

**Figure S16.** CV curves of (a) S/N-CMs-600 and (d) N-CMs-600 at different scan rates from 0.2 to 1.8  $\text{mV s}^{-1}$ . Capacitive contribution ratios of (b) S/N-CMs-600 and (e) N-CMs-600 at 1.4  $\text{mVs}^{-1}$ . Capacitive contribution ratios of (c) S/N-CMs-600 and (f) N-CMs-600 at different scan rates.

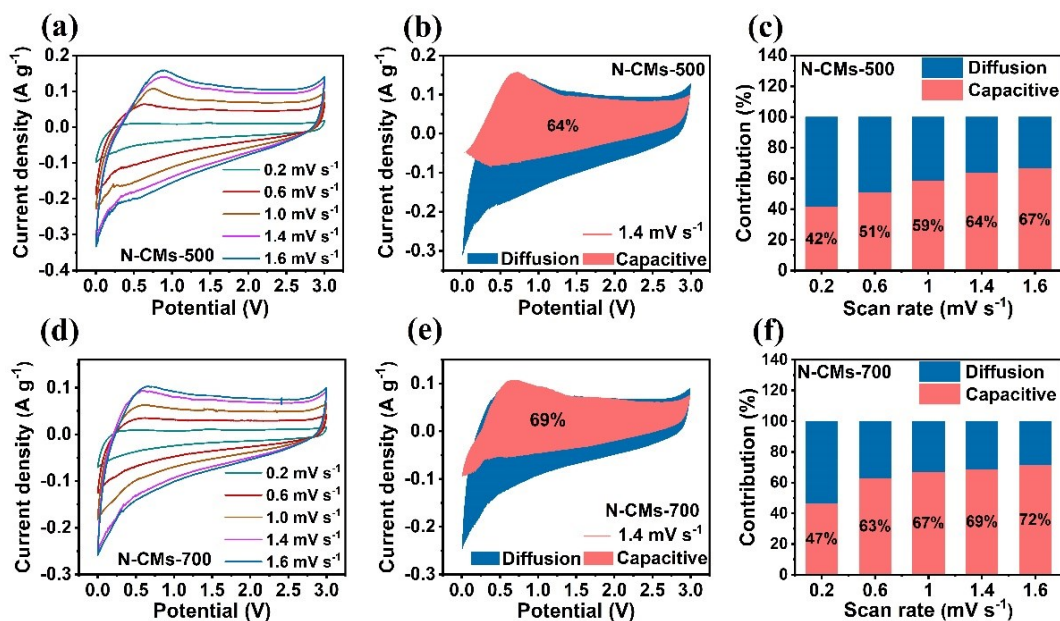

**Figure S17.** CV curves of (a) N-CMs-500 and (d) N-CMs-700 at different scan rates from 0.2 to 1.8  $\text{mV s}^{-1}$ . Capacitive contribution ratios of (b) N-CMs-500 and (e) N-CMs-700 at 1.4  $\text{mVs}^{-1}$ . Capacitive contribution ratios of (c) N-CMs-500 and (f) N-CMs-700 at different scan rates.

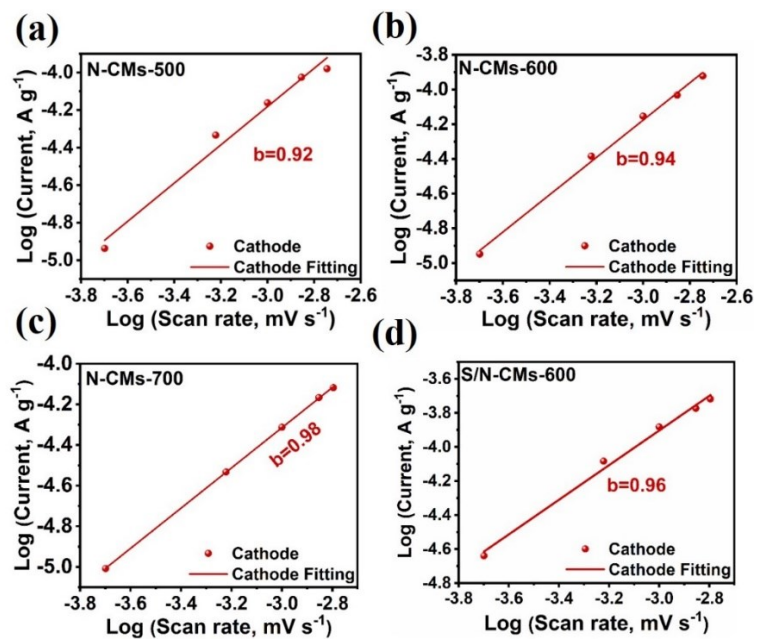

**Figure S18.** Slope fitting of  $b$  values for (a) N-CMs-500, (b) N-CMs-600, (c) N-CMs-700 and (d) S/N-CMs-600.

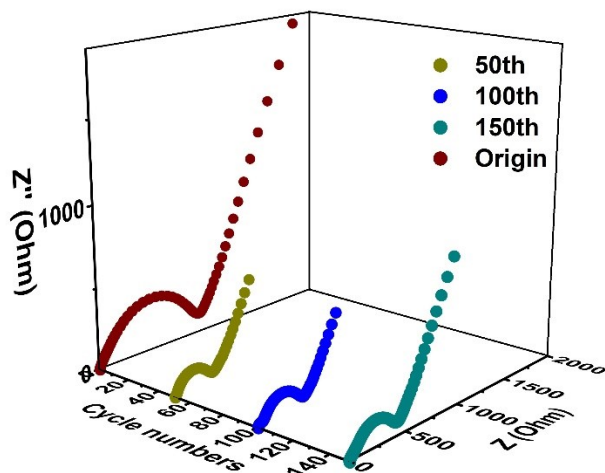

**Figure S19.** The Nyquist plots of S/N-CMs-600 after different cycles

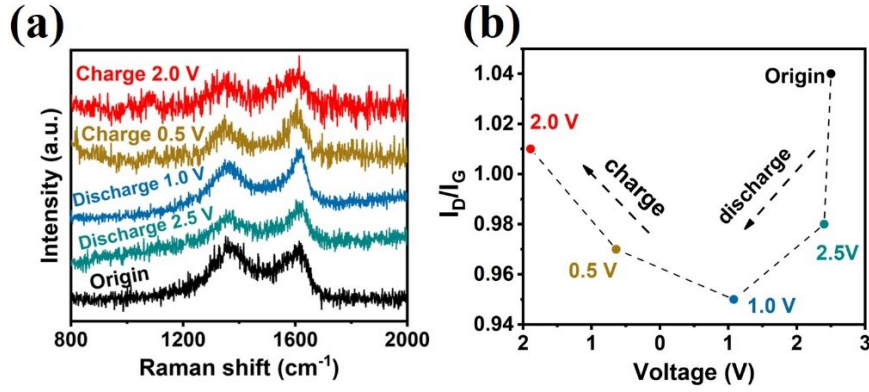

**Figure S20.** (a) Ex-situ Raman of S/N-CMs-600 at different voltages. (b) the  $I_D/I_G$  value changes accord to voltage changes

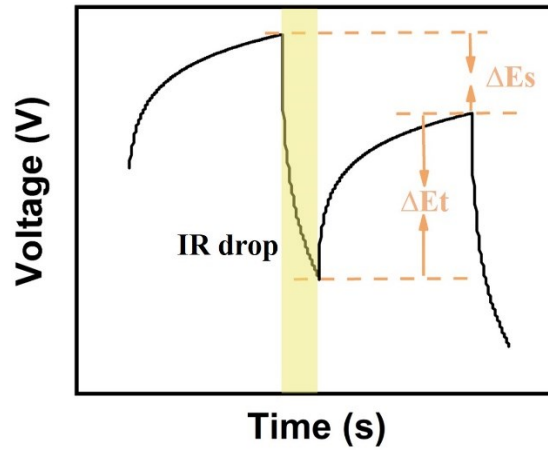

**Figure S21.** Schematic of the calculation of diffusion coefficient using the GITT technique.

Galvanostatic intermittent titration technique (GITT) is also employed to study the diffusion coefficient of K-ion in S/N-CMs-600 at  $0.1 \text{ A g}^{-1}$  for 0.2 h between rest intervals for 0.7 h. The diffusion coefficient can be calculated according to Fick's second law as follows <sup>5</sup>:

$$D = \frac{4}{\pi\tau} \left( \frac{m_B V_M}{M_B S} \right)^2 \left( \frac{\Delta E_s}{\Delta E_\tau} \right)^2$$

Here,  $\tau$  is the pulse time,  $M_B$  is molar mass of material,  $m_B$  and  $S$  are the active mass and surface area for the test sample,  $V_M$  is the molar volume,  $\Delta E_s$  and  $\Delta E_\tau$  can be obtained from our test results.



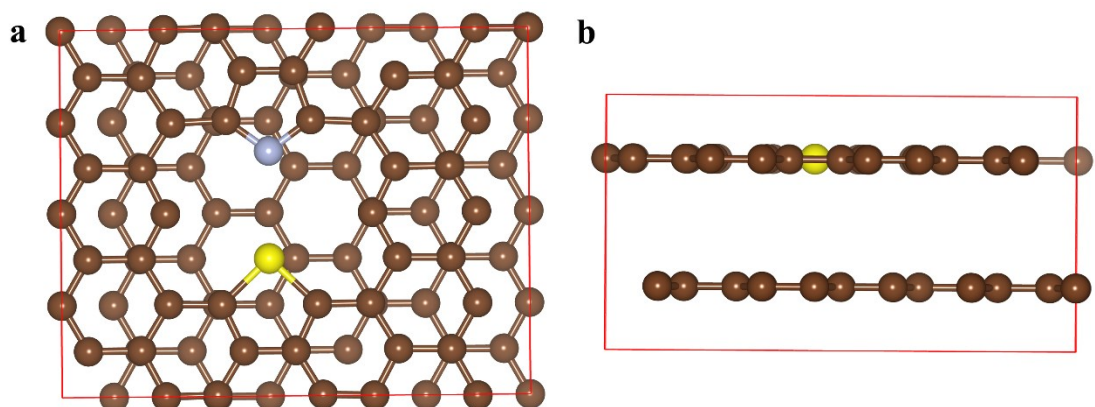

**Figure S22.** The model of pyrrolic N with S dual-doped carbon ( $N_5SC$ ). (a) Top view (b) side view. The brown, grey, and yellow balls represent C, N, and S atoms, respectively.

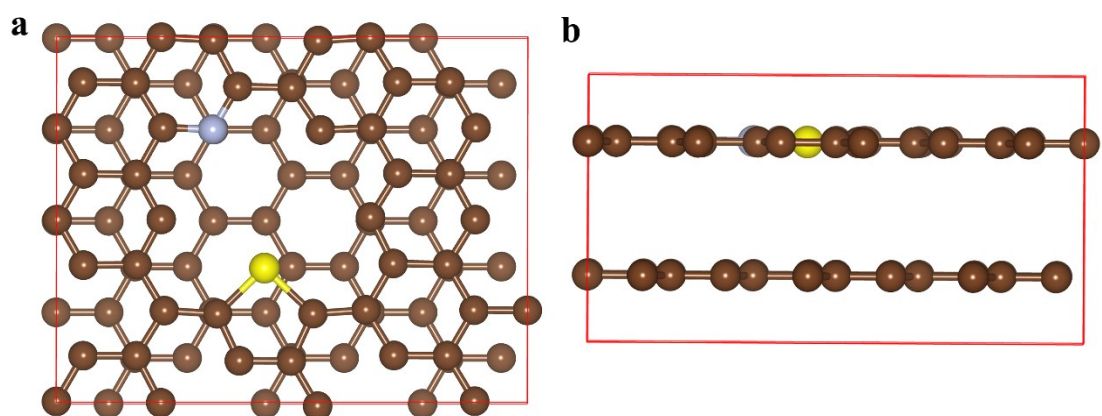

**Figure S23.** The model of pyridinic N with S dual-doped carbon ( $N_6SC$ ). (a) Top view (b) side view. The brown, grey, and yellow balls represent C, N, and S atoms, respectively.

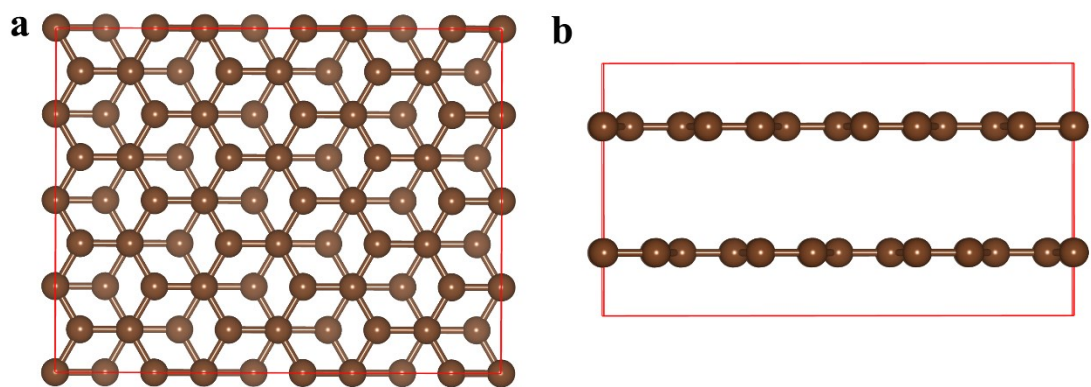

**Figure S24.** The model of pristine carbon. (a) Top view (b) side view. The brown ball is C atom.

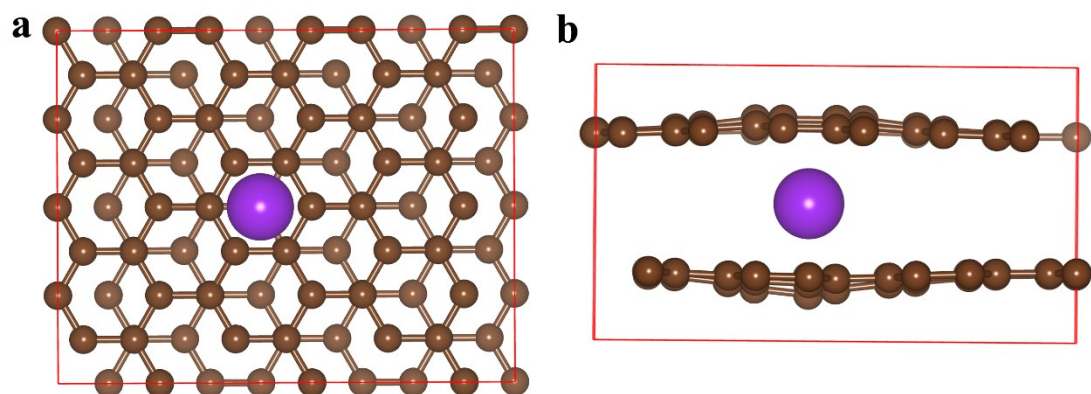

**Figure S25.** The structure of K intercalating into pristine carbon from top view (a) and side view (b). The brown and purple balls are C and K atoms, respectively.



**Table S1.** BET surface areas and pore features of samples.

| <b>Samples</b> | <b>Specific area<br/>(m<sup>2</sup> g<sup>-1</sup>)</b> | <b>Pore volume<br/>(cm<sup>3</sup> g<sup>-1</sup>)</b> | <b>Pore diameter<br/>(nm)</b> |
|----------------|---------------------------------------------------------|--------------------------------------------------------|-------------------------------|
| N-CMs-500      | 511.24                                                  | 1.288                                                  | 7.812                         |
| N-CMs-600      | 621.87                                                  | 1.661                                                  | 8.480                         |
| N-CMs-700      | 642.69                                                  | 2.037                                                  | 9.839                         |
| S/N-CMs-600    | 473.98                                                  | 1.165                                                  | 8.561                         |

**Table S2.** Comparison of the cycling stability in this work with previously reported carbon materials.

| <b>Samples</b>                               | <b>Current density<br/>(mA g<sup>-1</sup>)</b> | <b>Cycle<br/>number</b> | <b>Capacity<br/>(mAh g<sup>-1</sup>)</b> | <b>Ref.</b> |
|----------------------------------------------|------------------------------------------------|-------------------------|------------------------------------------|-------------|
| N/S dual-doped carbon                        | 1000/100                                       | 1000/200                | 178.0/359.0                              | 6           |
| N-doped porous carbon                        | 500/50                                         | 1000/100                | 121.3/296.8                              | 7           |
| Biomorphic-based N-doped carbon              | 1000/100                                       | 1000/200                | 74.1/263.6                               | 8           |
| N/S co-doped carbon                          | 1000/100                                       | 1000/100                | 249.5/321.3                              | 9           |
| Hollow carbon bowls                          | 1000/100                                       | 1000/150                | 133.0/304.1                              | 10          |
| Sulfur and nitrogen codoped carbon nanofiber | 2000/500                                       | 1000/200                | 168.0/191.0                              | 11          |
| N/S co-doped graphene                        | 1000/100                                       | 2000/200                | 188.8/251.2                              | 12          |
| S/N-CMs-600                                  | 2000/100                                       | 1000/100                | 283.3/441.5                              | This work   |

## References

- [1] G. Kresse and J. Hafner, *Phys Rev B.*, 1993, **48**, 13115.
- [2] J. P. Perdew, K. Burke and M. Ernzerhof, *Phys Rev Lett.*, 1996, **77**, 3865.
- [3] G. Kresse and D. Joubert, *Phys Rev B.*, 1999, **59**, 1758.
- [4] H. J. Monkhorst and J. D. Pack, *Phys Rev B.*, 1976, **13**, 5188.
- [5] L. Tao, Y. P. Yang, H. L. Wang, Y. L. Zheng, H. C. Hao, W. P. Song, J. Shi, M. H. Huang and D. Mitlin, *Energy Storage Mater.*, 2020, **27**, 212-225.
- [6] Q. D. Liu, F. Han, J. F. Zhou, Y. Li, L. Chen, F. Q. Zhang, D. W. Zhou, C. Ye, J. X. Yang, X. Wu and J. S. Liu, *ACS Appl. Mater. Interfaces*, 2020, **12**, 20838-20848.
- [7] X. J. Qi, K. S. Huang, X. Wu, W. Zhao, H. Wang, Q. C. Zhuang and Z. C. Ju, *Carbon*, 2018, **131**, 79-85.
- [8] C. L. Gao, W. G. Qing, S. H. Luo, Z. Y. Wang, Y. H. Zhang, Y. G. Liu, A. M. Hao, R. Guo, *J. Power. Sources*, 2019, **415**, 165-171.
- [9] B. B. Fan, J. X. Yan, A. P. Hu, Z. Liu, W. Z. Li, Y. H. Li, Y. L. Xu, Y. Zhang, Q. L. Tang, X. H. Chen and J. L. Liu, *Carbon*, 2020, **164**, 1-11.
- [10] Z. L. Zhang, B. R. Jia, L. Liu, Y. Z. Zhao, H. Y. Wu, M. L. Qin, K. Han, W. A. Wang, K. Xi, L. Zhang, G. G. Qi, X. H. Qu and R. V. Kumar, *ACS Nano*, 2019, **13**, 11363-11371.
- [11] C. X. Lv, W. J. Xu, H. L. Liu, L. X. Zhang, S. Chen, X. F. Yang, X. J. Xu, D. J. Yang, *Small*, 2019, **15**, 1900816.
- [12] W. X. Yang, J. H. Zhou, S. Wang, Z. C. Wang, F. Lv, W. S. Zhang, W. Y. Zhang, Q. Sun and S. J. Guo, *ACS Energy Lett.*, 2020, **5**, 1653-1661.
